# Supplementary material for: Triplet formation inhibits amplified spontaneous emission in perylene-based polycyclic aromatic hydrocarbons
Source: Royal Society of Chemistry journal article supplement (doi:10.1039/d3tc04740g), 2024-01-01
Supplement: d3tc04740g1.pdf [file d3tc04740g1.pdf]

## Supporting Information

### Triplet Formation Inhibits Amplified Spontaneous Emission in Perylene-Based Polycyclic Aromatic Hydrocarbons

Sergio Moles Quintero,<sup>a</sup> Jose C. Mira-Martínez,<sup>b</sup> Ya Zou,<sup>c</sup> Marcos Díaz-García,<sup>a</sup> Pedro G. Boj,<sup>d</sup> Jishan Wu,<sup>\*c</sup> María A. Díaz-García,<sup>\*b</sup> Jose M. Marín-Beloqui,<sup>\*a</sup> Juan Casado<sup>\*a</sup>

<sup>a</sup>Department of Physical Chemistry, University of Malaga, Campus de Teatinos s/n, Malaga, 29071, Spain. E-mail: jm.marinbeloqui@uma.es, casado@uma.es.

<sup>b</sup>Departamento Física Aplicada and Instituto Universitario de Materiales de Alicante, Universidad de Alicante, 03080, Alicante, Spain. Email: maria.diaz@ua.es

<sup>c</sup>Department of Chemistry, National University of Singapore, 3 Science Drive 3, Singapore, 117543 (Singapore). Email: chmwuj@nus.edu.sg

<sup>d</sup>Departamento Óptica, Farmacología y Anatomía, and Instituto Universitario de Materiales de Alicante, Universidad de Alicante, 03080, Alicante, Spain.

\*Corresponding Authors:

Email address: chmwuj@nus.edu.sg

Email address: maria.diaz@ua.es

Email address: jm.marinbeloqui@uma.es

Email address: casado@uma.es.

## Experimental section

**Spectroscopic Characterisation.** The absorbance and emission properties were evaluated in a 2-methyl tetrahydrofuran (2-MeTHF) solution at different temperatures from room temperature to 80 K using a cryostat OPTISTAT from Oxford instruments. Emission was measured using a spectrofluorometer from Edinburgh Analytical Instrument (FLS920P) equipped with a pulsed xenon flash-lamp, Xe900, of 400 mW. Microsecond transient absorption spectroscopy was measured in fresh *ca.*  $10^{-3}$  M  $\text{CH}_2\text{Cl}_2$  solutions at room temperature by means of a laser flash photolysis system from Luzchem with a pulsed Nd:YAG laser, using 355 nm excitation wavelength. Probe light was provided by a Lo255 Oriel xenon lamp. The apparatus is completed with a 77200 Oriel monochromator, an Oriel photomultiplier (PMT) system and a TDS-640A Tektronix oscilloscope. The energy single pulses were of *ca.* 15 mJ. Femtosecond transient absorption spectroscopy was performed with a Helios equipment from Ultrafast Systems, equipped with an amplified femtosecond Spectra-Physics Solstice-100F laser (with a 128 fs pulse width and 1 KHz repetition rate) coupled with a Spectra-Physics TOPAS Prime F optical parametric amplifier (195-22000 nm). Samples were studied in  $\text{CH}_2\text{Cl}_2$  *ca.*  $10^{-3}$  M solutions, with an excitation wavelength of 490, 560 and 640 nm for YZ-1, YZ-2 and YZ-3, respectively.

**Thin Film Fabrication.** YZ-n:PS films were prepared by spin-coating a toluene solution of the YZ-n dyes and PS as inert polymer matrix (dye content with respect to PS was in the range 0.5 - 6 wt%, see table S1). This solution was spin-coated over quartz substrates using a SMA-SPINNER 6000 PRO. The amount of solvent was adjusted to obtain proper film thickness (see values in Table S1) to ensure minimal waveguide losses and optimized ASE performance.

**Thin Film Characterisation.** Thin film absorption (and transmission) and PL characterisation was performed using a double-beam Jasco V-650 spectrophotometer and a Jasco FP-6500 spectrofluorometer, respectively. Film thickness was determined from the transmission spectrum in the transparent spectral window by a method recently reported by some of the authors (V. Bonal et al. *Polymers*, 2021, **13**, 2545).

The ASE characterisation of the films was performed under excitation with a built-in optical parametric oscillator pumped with the third harmonic of a pulsed Nd:YAG laser (10 Hz; 355 nm). The pump energy density impinging over the samples was varied using neutral density filters. The beam was shaped into a stripe (3.5 mm  $\times$  0.5 mm) with a cylindrical lens and an adjustable slit and then projected perpendicularly over the sample. The emitted ASE light was collected from the sample edge with an optical fiber coupled to a spectrophotometer (Ocean Optics, USB2000+ UV–VIS) of 1.3 nm resolution.

| Molecule | Solvent                         | $\Phi_F$ | Fluorescence Lifetime |
|----------|---------------------------------|----------|-----------------------|
| YZ-1     | CH <sub>2</sub> Cl <sub>2</sub> | 0.89     | 3.5 ns                |
|          | 2Me-THF                         | 0.70     | 3.4 ns                |
| YZ-2     | CH <sub>2</sub> Cl <sub>2</sub> | 0.76     | 10.9 ns               |
|          | 2Me-THF                         | 0.55     | 8.0 ns                |
| YZ-3     | CH <sub>2</sub> Cl <sub>2</sub> | 0.52     | 11.0 ns               |
|          | 2Me-THF                         | 0.52     | 9.4 ns                |

**Table S1.** PL parameters comparison between 2-MeTHF and CH<sub>2</sub>Cl<sub>2</sub> solutions. Fluorescence quantum yield ( $\Phi_F$ ) was measured using an integrating sphere.

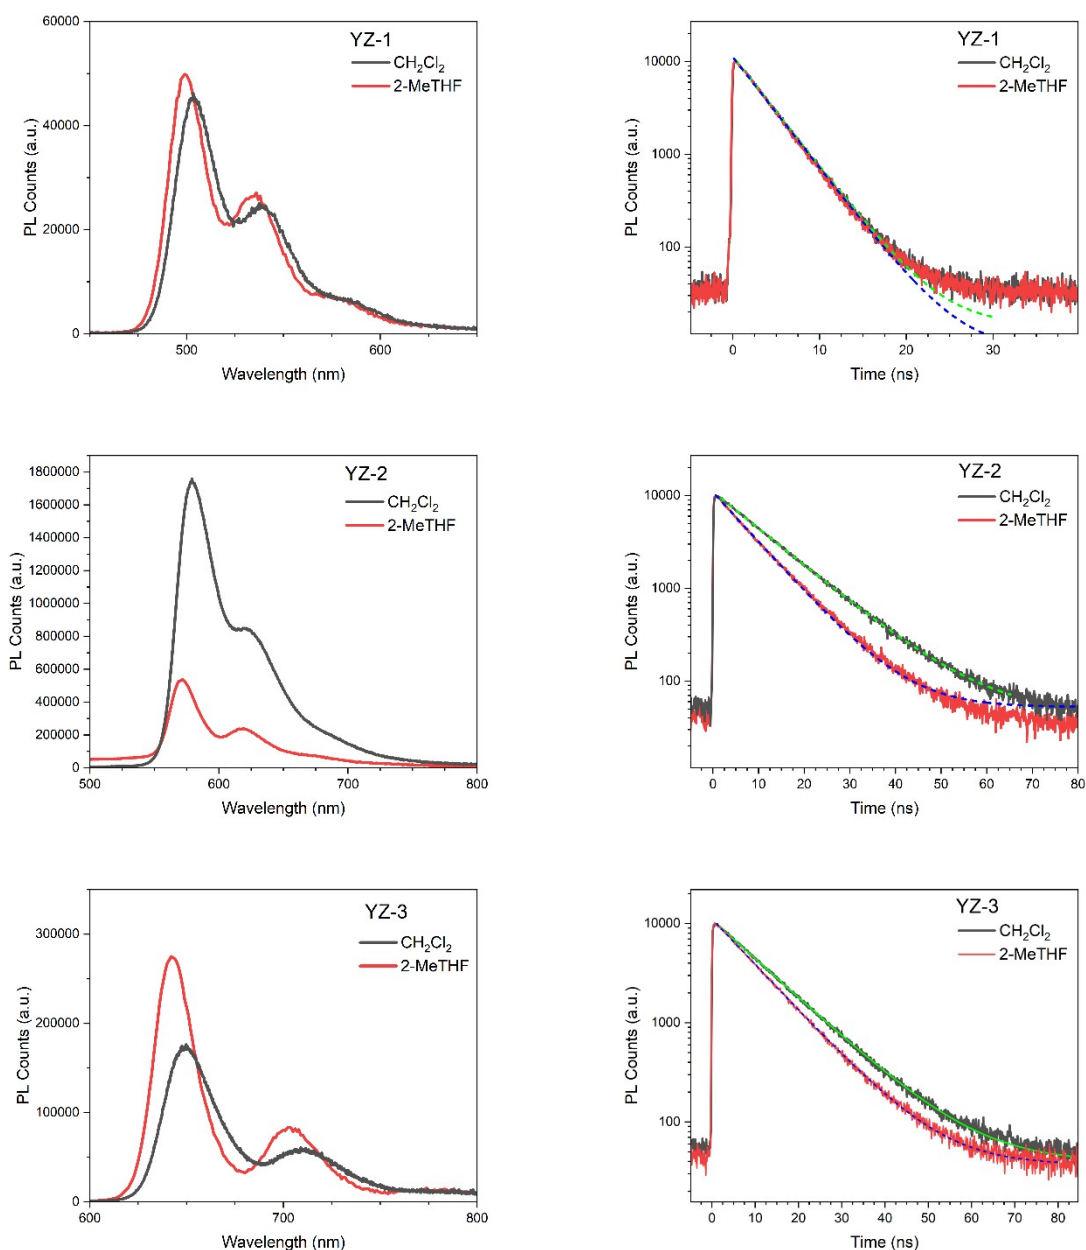

**Fig. S1.** Fluorescence (a, c, e) spectra and (b, d, f) decays of (a, b) YZ-1, (c, d) YZ-2 and (e, f) YZ-3 comparing the optical properties in  $\text{CH}_2\text{Cl}_2$  (black) and 2-MeTHF (red) solutions. The dashed lines are the monoexponential fittings for fluorescence decay lifetimes of  $\text{CH}_2\text{Cl}_2$  (green) and 2-MeTHF (blue) solutions

| YZ derivative | YZ (wt. %) in PS <sup>a</sup> | $\lambda_{\text{ABS-max}}^b$ (nm) | $\lambda_{\text{PL-max}}^c$ (nm) | $h^d$ (nm) | $\lambda_p^e$ (nm) | $\alpha[\lambda_p]^f$ ( $\times 10^3 \text{ cm}^{-1}$ ) | $t_p[\lambda_p]^g$ (ns) | $\lambda_{\text{ASE}}^h$ (nm) | $\text{FWHM}_{\text{ASE}}^i$ (nm) | $E_{\text{th-ASE}}^j$ (mJ/cm <sup>2</sup> ) | $I_{\text{th-ASE}}^j$ (kW/cm <sup>2</sup> ) |
|---------------|-------------------------------|-----------------------------------|----------------------------------|------------|--------------------|---------------------------------------------------------|-------------------------|-------------------------------|-----------------------------------|---------------------------------------------|---------------------------------------------|
| 01            | 1                             | <u>334</u> , 366                  | <u>502</u> , 535                 | 512        | 355                | 0.5                                                     | 5.7                     |                               |                                   |                                             |                                             |
|               | 3                             | <u>334</u> , 366                  | <u>505</u> , 537                 | 451        | 355                | 1.9                                                     | 5.7                     |                               |                                   |                                             |                                             |
|               | 6                             | <u>334</u> , 366                  | <u>513</u> , 532                 | 457        | 355                | 3.7                                                     | 5.7                     |                               |                                   |                                             |                                             |
| 02            | 1                             | 373, <u>418</u>                   | <u>574</u> , 619, 673            | 632        | 418                | 0.5                                                     | 3.7                     |                               |                                   |                                             |                                             |
|               | 3                             | 373, <u>418</u>                   | <u>574</u> , 619, 673            | 550        | 418                | 1.6                                                     | 3.7                     |                               |                                   |                                             |                                             |
|               | 6                             | 373, <u>418</u>                   | <u>574</u> , 619, 673            | 572        | 418                | 3.1                                                     | 3.7                     |                               |                                   |                                             |                                             |
| 03            | 0.5                           | 328, <u>458</u>                   | <u>648</u> , 706                 | 511        | 458                | 0.6                                                     | 4.0                     | 648                           | 11                                | 14.5                                        | 3600                                        |
|               | 0.75                          | 328, <u>458</u>                   | <u>648</u> , 706                 | 555        | 458                | 1.0                                                     | 4.0                     |                               |                                   |                                             |                                             |
|               | 1                             | 328, <u>458</u>                   | <u>648</u> , 706                 | 580        | 458                | 1.3                                                     | 4.0                     |                               |                                   |                                             |                                             |
|               | 1.5                           | 328, <u>458</u>                   | <u>648</u> , 706                 | 572        | 458                | 2.0                                                     | 4.0                     |                               |                                   |                                             |                                             |
|               | 2                             | 328, <u>458</u>                   | <u>648</u> , 706                 | 522        | 458                | 2.7                                                     | 4.0                     |                               |                                   |                                             |                                             |
|               | 3                             | 328, <u>458</u>                   | <u>648</u> , 706                 | 583        | 458                | 4.7                                                     | 4.0                     |                               |                                   |                                             |                                             |

**Table S2.** Summary of the photophysical data of the YZ-n containing PS films.

<sup>a</sup> Error ~0.1%

<sup>b</sup> Peak absorption wavelengths (maximum absorption peak is underlined)

<sup>c</sup> Peak photoluminescence wavelengths (maximum photoluminescence peak is underlined)

<sup>d</sup> Film thickness (error ~2%)

<sup>e</sup> Pump wavelength

<sup>f</sup> Absorption coefficient at  $\lambda_p$  (error ~2%)

<sup>g</sup> Pump pulse width at  $\lambda_p$

<sup>h</sup> ASE wavelength (error is  $\pm 0.5$  nm)

<sup>i</sup> ASE linewidth (error is  $\pm 1$  nm), defined as the full width at half maximum, FWHM, well above the threshold.

<sup>j</sup> ASE threshold (error ~20%)

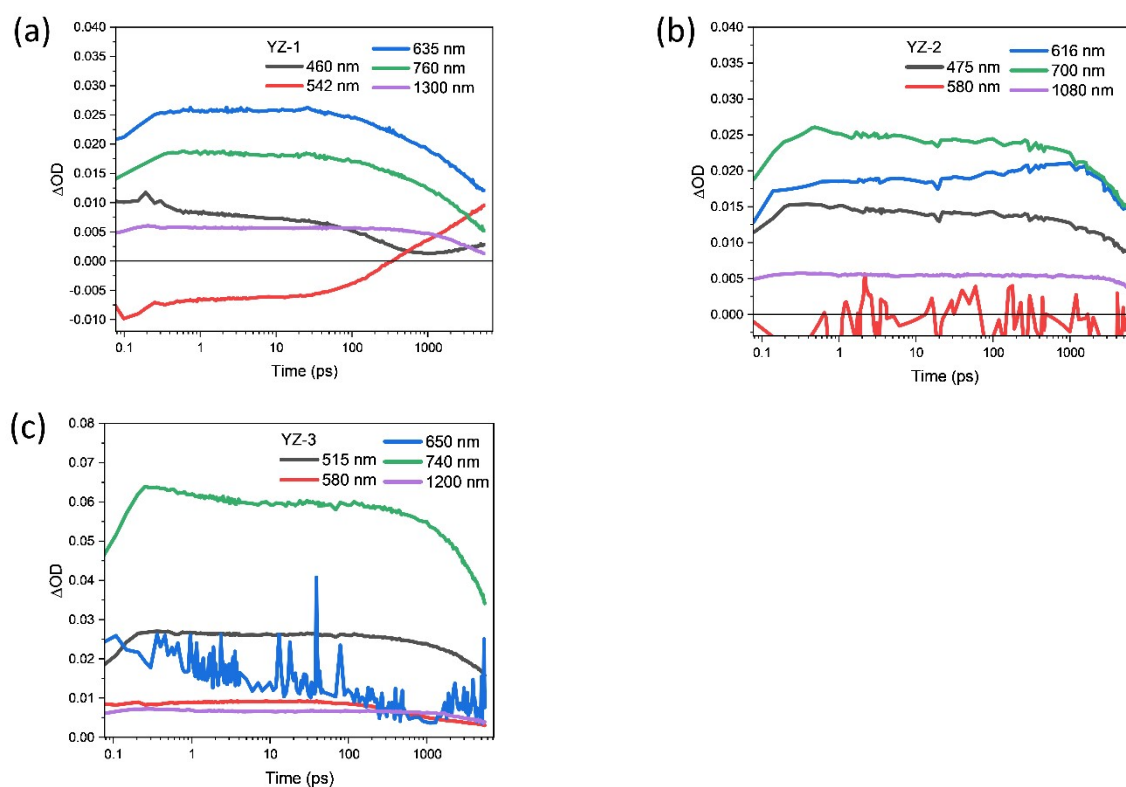

**Fig. S2.** Transient decays of fs-TAS of (a) YZ-1, (b) YZ-2 and (c) YZ-3 in a 2 Me-THF solution. Measurements were obtained exciting at 490, 560 and 640 nm for YZ-1, YZ-2 and YZ-3 with a power of 0.25 mW.

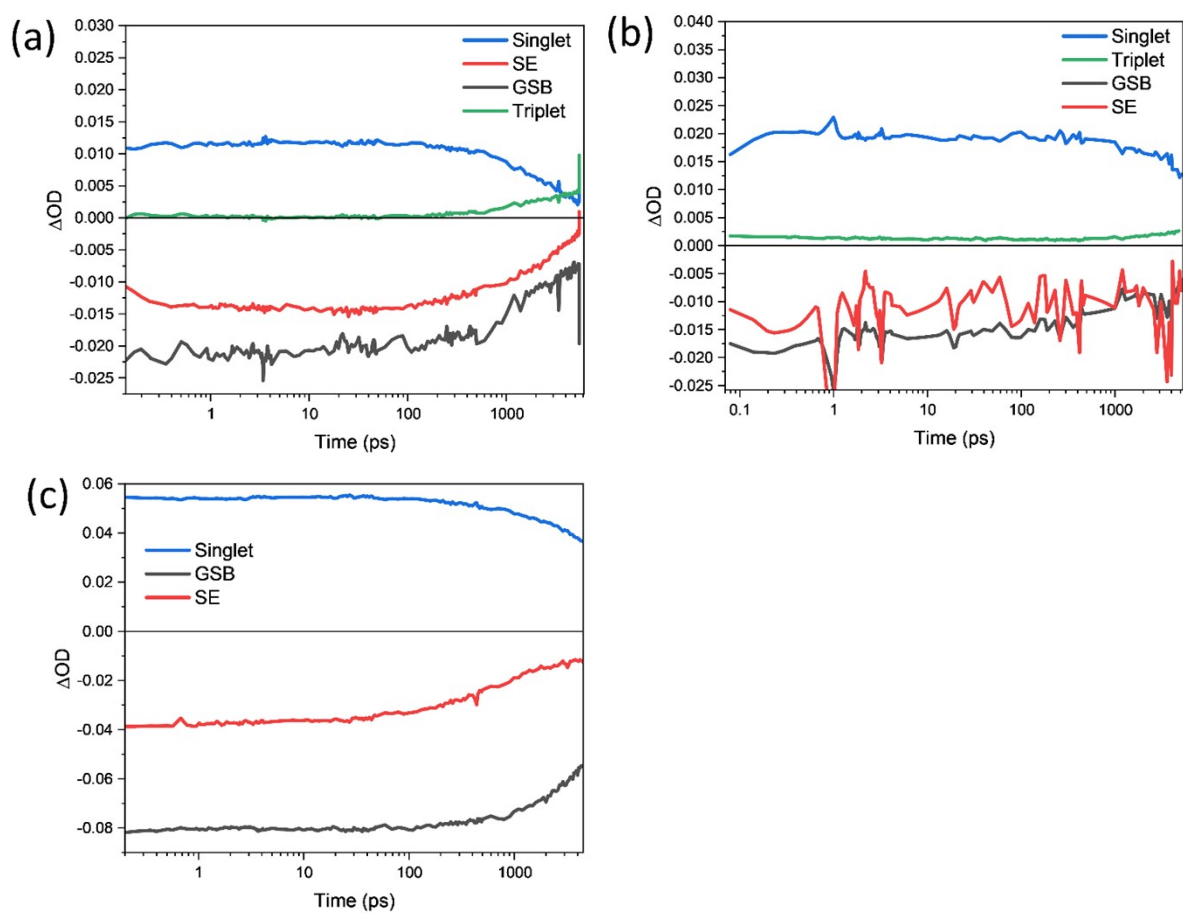

**Fig. S3.** Decays obtained by global analysis of the fs-TAS data from Fig. 4 for (a) YZ-1, (b) YZ-2 and (c) YZ-3.

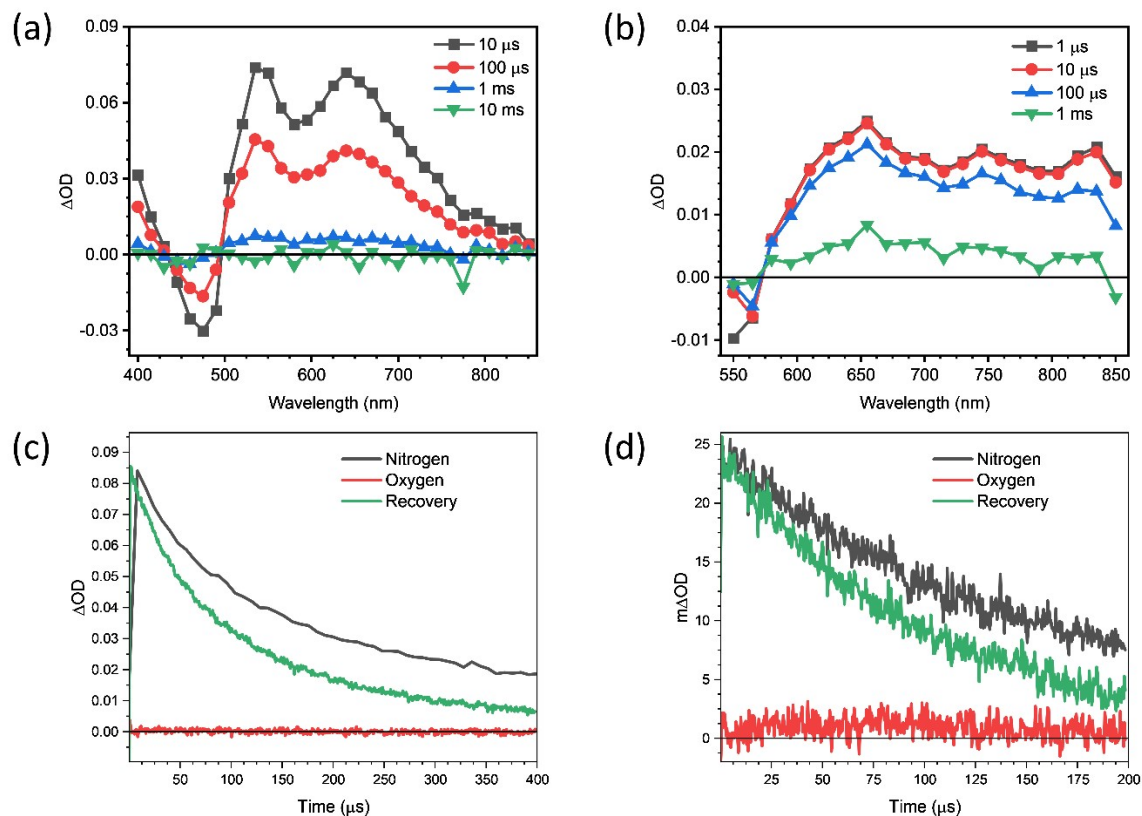

**Fig. S4.** Microsecond transient absorption spectroscopy of (a) YZ-1 and (b) YZ-2 in a 2-MeTHF solution. Transient decays at the absorption maxima of (c) YZ-1 and (d) YZ-2 and their oxygen dependence. Measurements were obtained exciting at 355 and 532 nm for YZ-1 and YZ-2 nm, respectively, at 15 mJ.

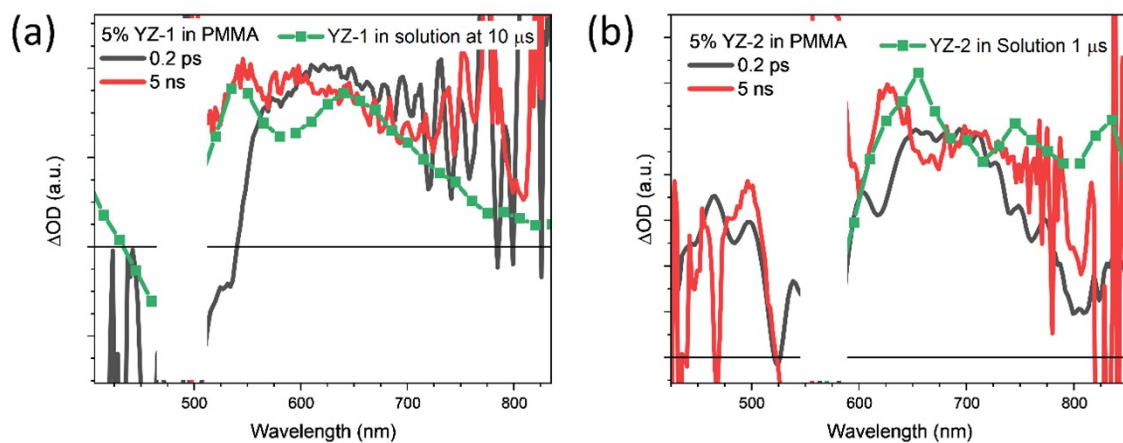

**Fig. S5.** Comparison of the spectra obtained by  $\mu s$ -TAS and ps-TAS for (a) YZ-1 and (b) YZ-2.

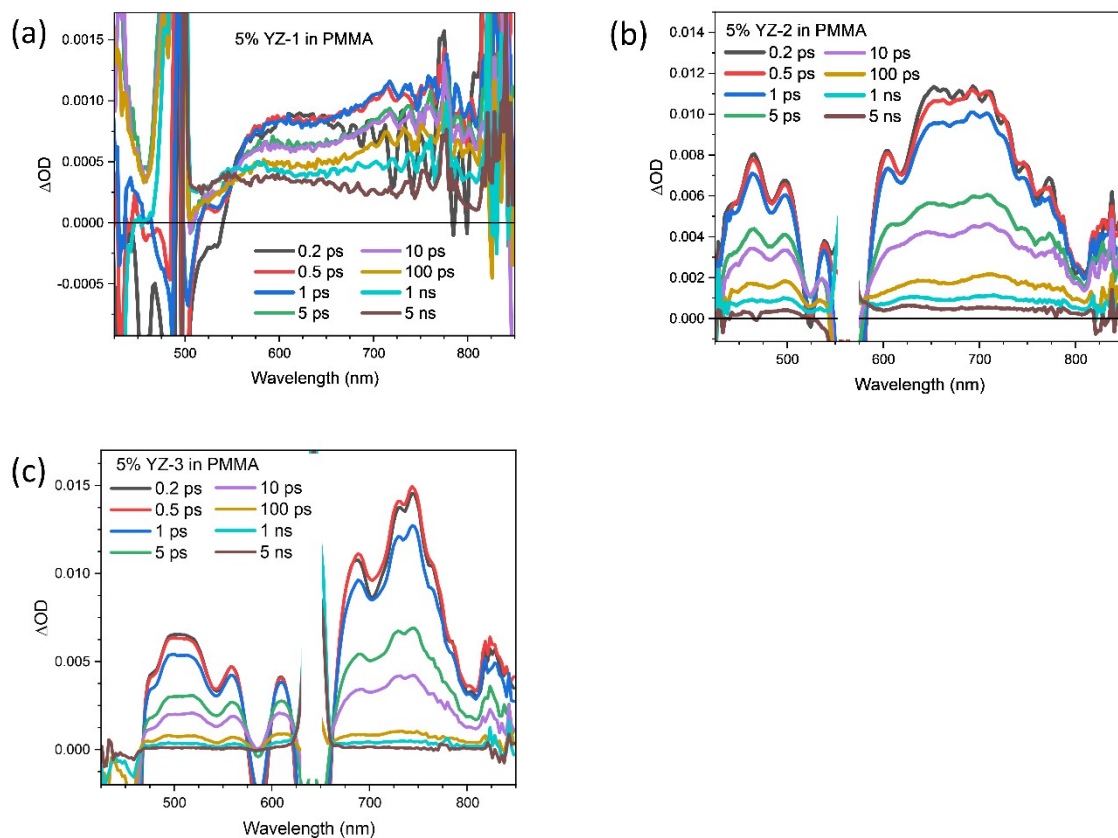

**Fig. S6.** Femtosecond transient absorption spectroscopy results of (a) YZ-1, (b) YZ-2 and (c) YZ-3 in a 1% solid matrix. Transient data was obtained exciting at 490, 560 and 640 nm for YZ-1, YZ-2 and YZ-3 with a power of 0.25 mW.

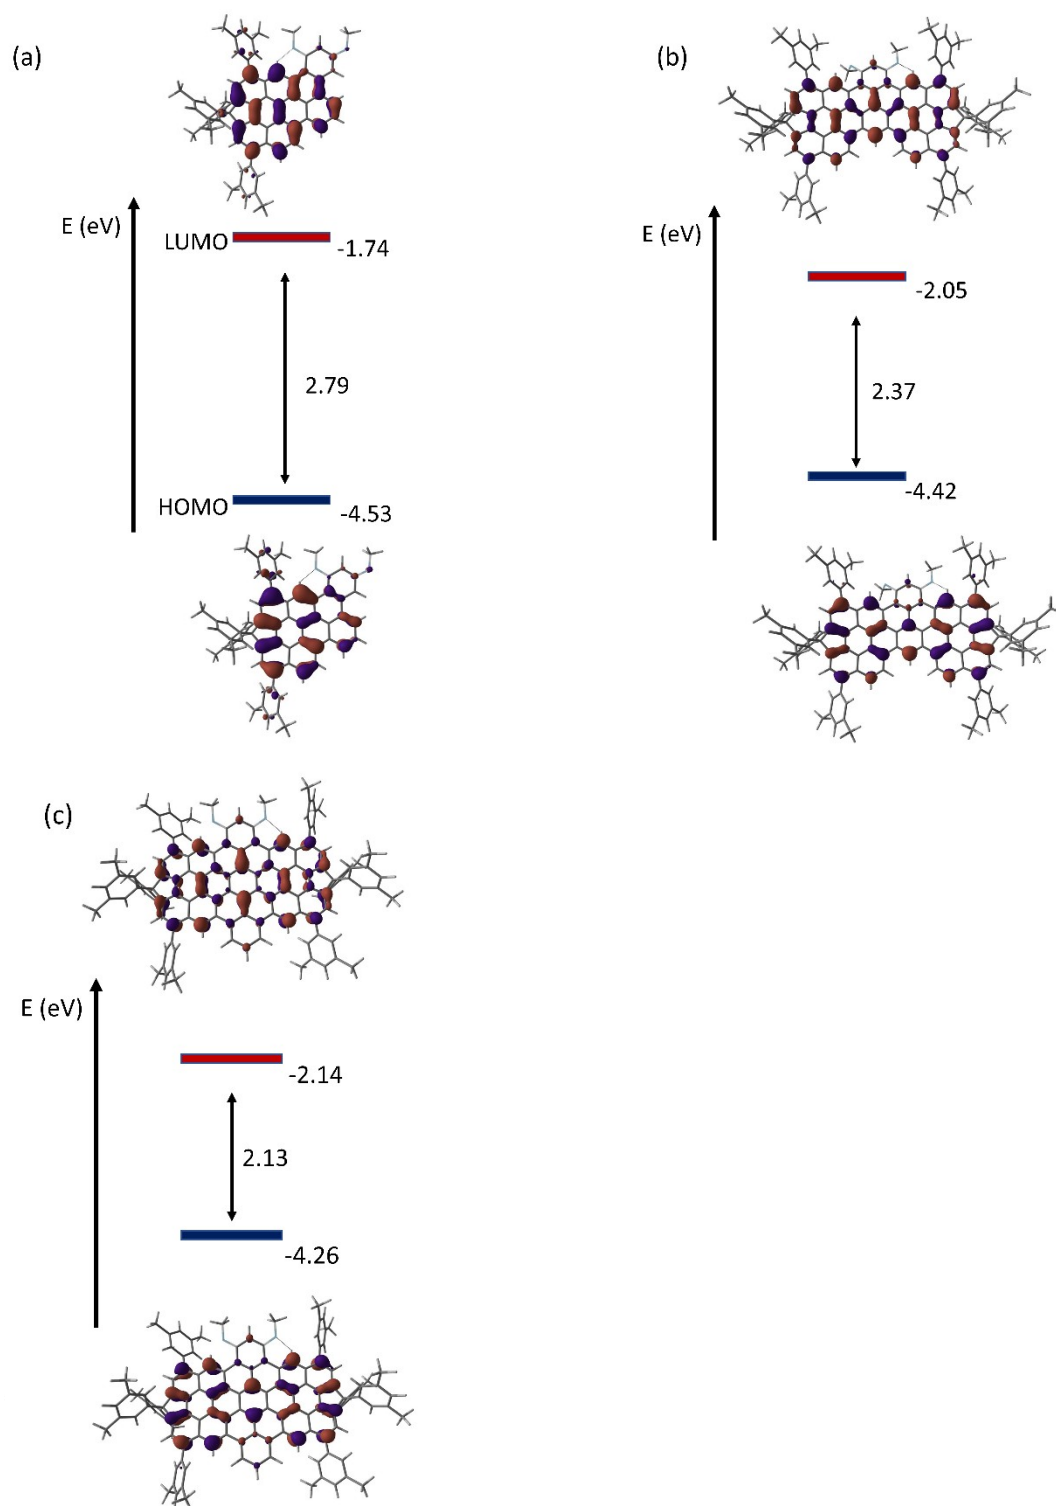

**Fig. S7.** Calculated HOMO and LUMO levels and the electronic distribution in vacuum of (a) YZ-1, (b) YZ-2 and (c) YZ-3. The geometry optimization was carried out at B3LYP/6-31G\*\* level of theory, whereas the vertical transitions were performed with TD-DFT calculations at B3LYP/6-31G level of theory.
